# Supplementary material for: One-step template-free synthesis of BaSb2O6 micro-flowers and their associated photocatalytic activity
Source: Royal Society of Chemistry journal article supplement (doi:10.1039/c2ce25478f), 2012-01-01
Supplement: c2ce25478f.pdf [file c2ce25478f.pdf]

Electronic Supplementary Material (ESI) for CrystEngComm

## One-Step Template-free Synthesis of BaSb<sub>2</sub>O<sub>6</sub> Micro-flowers and Their Associated Photocatalytic Activity

Jing Chen, Danzhen Li<sup>\*</sup>, Junhua Hu, Wei Chen, Jinxiu Wang, Yin Hu, Xianzhi Fu, Yu Shao

*Research Institute of Photocatalysis, State Key Laboratory Breeding Base of  
Photocatalysis, Fuzhou University, Fuzhou, 350002, P. R. China*

*Tel & Fax: (+86)591-83779256; E-mail: [dzli@fzu.edu.cn](mailto:dzli@fzu.edu.cn)*

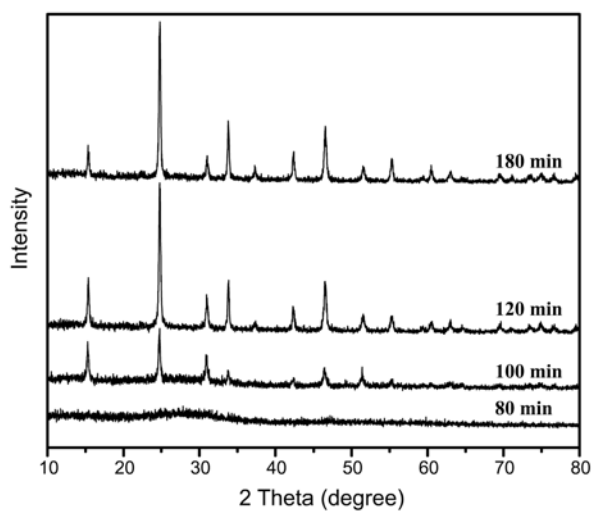

Figure S1. XRD patterns of the R-BaSb<sub>2</sub>O<sub>6</sub> formed during different reaction time

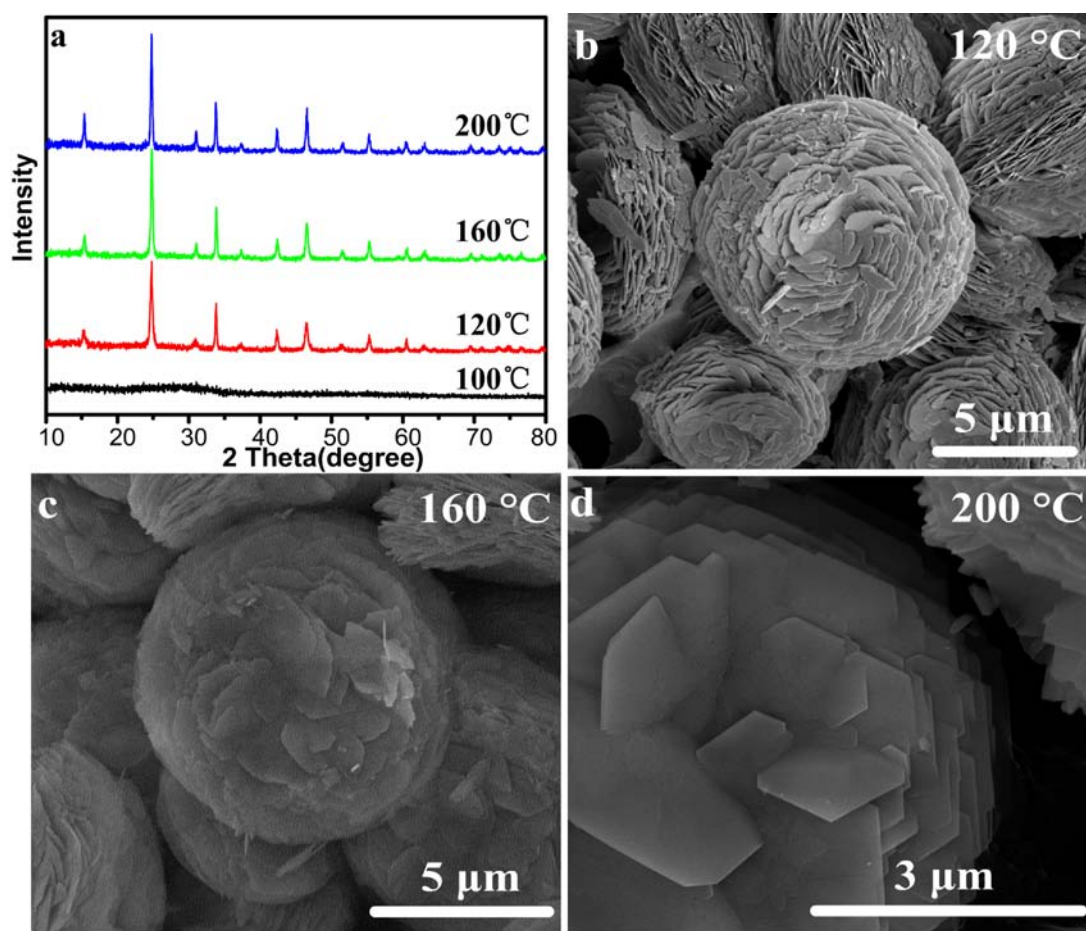

Figure S2. XRD patterns of the R-BaSb<sub>2</sub>O<sub>6</sub> synthesized at different temperatures (a), variation of R-BaSb<sub>2</sub>O<sub>6</sub> morphologies with reaction temperature from 120 to 200 °C (b) ~ (d).

The reaction temperature related variation of R-BaSb<sub>2</sub>O<sub>6</sub> morphologies is investigated. As shown in Figure S2, the rose-flower-like 3D hierarchical structures can be obtained at the range of 120~200 °C reacting for 48 hr at pH=3. However, only the samples synthesized at 200 °C shows the clear edges and sharp angles. While the samples synthesized at 160 °C and 120 °C are round and their edges are fuzzy. So, all the other samples in this paper were synthesized at 200 °C.

Table S1 The scales of samples synthesized at different pH values of precursor

solution at 200 °C for 48 hr

| pH values                                                                     | 1  | 2   | 3   | 4   | 5    |
|-------------------------------------------------------------------------------|----|-----|-----|-----|------|
| Scale of the hexagonal plate or the hierarchical structures <sup>1</sup> (μm) | 16 | 11  | 7   | 8   | 7    |
| Thickness of one layer (μm)                                                   | 1  | 0.7 | 0.1 | 0.1 | ---- |

<sup>1</sup> Length of the longest diagonal of the hexagonal plate or the diameter of the hierarchical structures (μm).

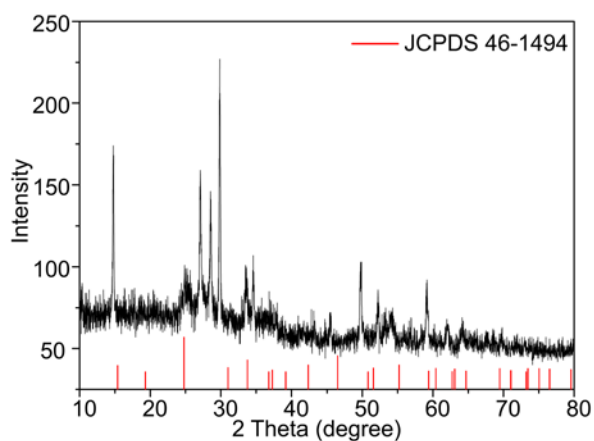

Figure S3. XRD pattern of the white precipitate at 200 °C with pH=0.5 for 48 hr.

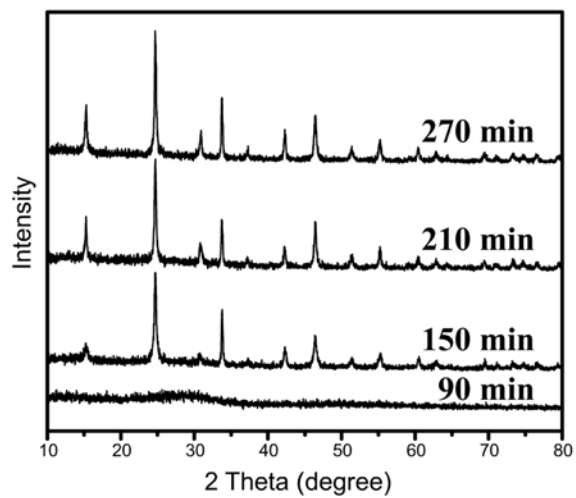

Figure S4. XRD patterns of M-BaSb<sub>2</sub>O<sub>6</sub> formed during different reaction time.

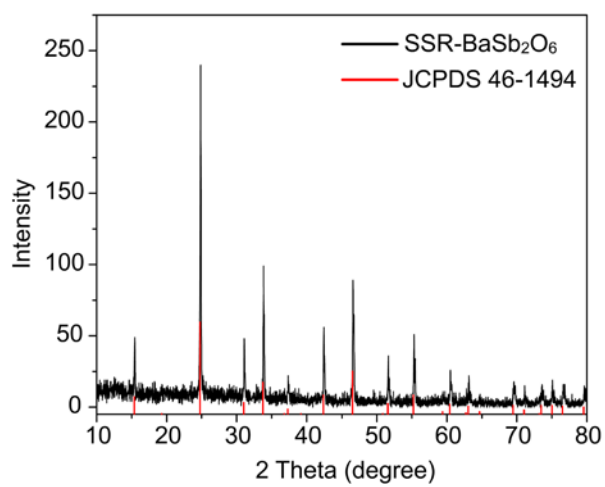

Figure S5. XRD pattern of SSR-BaSb<sub>2</sub>O<sub>6</sub>

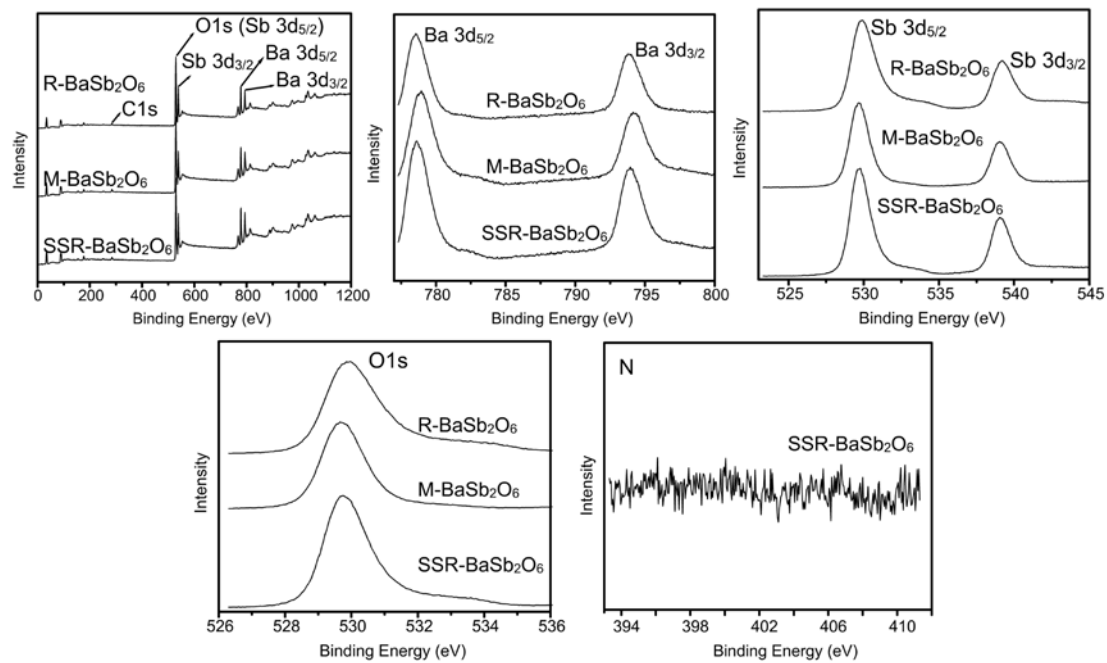

Figure S6 XPS of SSR-BaSb<sub>2</sub>O<sub>6</sub> and flower-like BaSb<sub>2</sub>O<sub>6</sub>

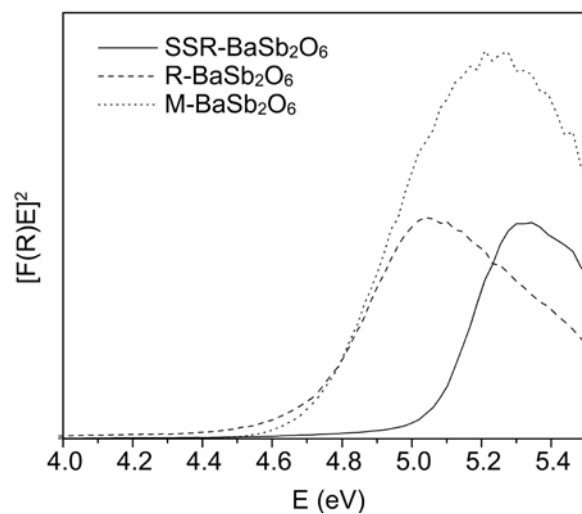

Figure S7 DRS of flower-like BaSb<sub>2</sub>O<sub>6</sub> and SSR-BaSb<sub>2</sub>O<sub>6</sub>
